# Supplementary material for: Melanoma-specific bcl-2 promotes a protumoral M2-like phenotype by tumor-associated macrophages
Source: PubMed Central journal article supplement (PMC7254128; doi:10.1136/jitc-2019-000489), 2020-04-07
Supplement: jitc-2019-000489supp001.pdf [file jitc-2019-000489supp001.pdf]

**ONLINE SUPPLEMENTARY FILES LEGENDS**

**Online supplementary Table S1.** Primers used for qRT-PCR analysis.

**Online supplementary Table S2.** Primers used for ChIP analysis.

**Online supplementary Figure S1. (A-B)** Western Blot analysis of Bcl-2 protein expression in **(A)** M14 and **(B)** A375SM-SC1 control cells and their bcl-2 overexpressing derivatives.  $\beta$ -actin is shown as loading and transferring control. Representative Western Blot analyses out of two with similar results are reported. **(C,D)** qRT-PCR analysis of CD206, IL-10, CCL1, CCL22, IL-12, COX-2 mRNA expression in **(C)** THP-1 cells and in **(D)** human monocyte-derived macrophages (M-DM) after 24h exposure to CM derived from bcl-2 overexpressing or control A375SM-SC1 cells. **(E)** qRT-PCR analysis of bcl-2 mRNA levels in M14 and A375SM-SC1 melanoma cells transfected with siRNA control (si-control) or siRNA against bcl-2 (si-bcl-2). **(F)** qRT-PCR analysis of CD206, IL-10, CCL1, CCL22, IL-12, COX-2 mRNA expression in M-DM exposed to CM derived from A375SM-SC1 cells transfected as in **(E)**. **(G)** Representative images (left panel) and relative quantification (right panel) of migrated THP-1 cells in response to culture medium (CM) derived from A375SM-SC1 control (CM A375SM-SC1 Control) or bcl-2 overexpressing (CM A375SM-SC1 Bcl-2) melanoma cells. The values are reported as number of migrated cells/field. The quantification was performed by counting the number of migrated cells in at least 10 fields for each condition. The average  $\pm$  SD of three independent experiments is reported. **(C,D,F)** The results are reported as % of mRNA variation in macrophages exposed to CM derived from **(C,D)** bcl-2 overexpressing cells versus control one and from **(F)** bcl-2 silenced versus control cells. The average  $\pm$  SEM of three independent experiments is reported. p-values were calculated between macrophages exposed to CM from **(C,D)** control and bcl-2 overexpressing cells, or from **(F)** control and bcl-2 silenced cells. \*p<0.05.

**Online supplementary Figure S2. COX-2, PGE2, IL-1 $\beta$ , IL-8, IL-17 and CCL2 expression in A375SM-SC1 control and bcl-2 overexpressing cells.** **(A)** qRT-PCR analysis of COX-2 expression in A375SM-SC1 control and bcl-2 overexpressing cells (Bcl-2). **(B)** ELISA of PGE2

levels in cultured medium (CM) from A375SM-SC1 control and bcl-2 overexpressing cells. PGE<sub>2</sub> levels were normalized to the number of adherent cells. Results are reported as average  $\pm$  SD of three independent experiments. **(C, D)** qRT-PCR analysis of **(C)** IL-1 $\beta$ , IL-8 and IL-17 and **(D)** CCL2, CSF-1 and SDF1 mRNA expression in A375SM-SC1 control and bcl-2 overexpressing cells. **(E)** Analysis of mRNA levels of IL-17 (IL-17RA), IL-8 (CXCR1) and CCL2 (CCR2) receptors in M-DM stimulated with cultured medium from M14 control or bcl-2 overexpressing cells. The results are reported as % of mRNA variation in macrophages exposed to CM derived from bcl-2 overexpressing cells versus control one. \*p<0.05. **(A, C-E)** The results represent the average  $\pm$  SEM of three independent experiments. **(A-D)** Fold induction of bcl-2 overexpressing cells relative to control cells is reported. \*p<0.05.

**Online supplementary Figure S3. Macrophages differentiation and migration after exposure to CM from H1299 parental and bcl-2 overexpressing cells.** **(A)** mRNA levels of the indicated molecules by qRT-PCR in M-DM exposed for 24h to CM derived from H1299 human non-small cell lung carcinoma control (CM H1299 Control) or bcl-2 overexpressing (CM H1299 Bcl-2) cells. The results are reported as % of mRNA variation in macrophages exposed to CM derived from bcl-2 overexpressing cells versus control ones. **(B)** Representative images (left panel) and relative quantification (right panel) of THP-1 cell migration in response to CM derived from H1299 control or bcl-2 overexpressing cells. The values are reported as number of migrated cells/field. The quantification was performed by counting the number of migrated cells in at least 10 fields for each condition. **(C)** qRT-PCR analysis of IL-1 $\beta$ , IL-8, COX-2 and CCL2 expression in H1299 control and bcl-2 overexpressing cells. Fold induction relative to control is reported. The results represent the average  $\pm$  SEM **(A,C)** or  $\pm$  SD **(B)** of three independent experiments. \*p<0.05.

**Online supplementary Figure S4. Involvement of NF- $\kappa$ B in IL-1 $\beta$ , IL-8, IL-17, COX-2 and CCL2 expression in A375SM-SC1 cells and in macrophage differentiation.** **(A)** qRT-PCR analysis of RORa and RORc mRNA levels in M14 control and bcl-2 overexpressing cells (M14 Bcl-2/6). Western Blot analysis of IKB $\alpha$  protein level in **(B)** M14 and **(C)** A375SM-SC1 control

cells, bcl-2 overexpressing cells (Bcl-2) and bcl-2 overexpressing cells transiently transfected with IKBSR (Bcl-2 IKBSR). HSP72/73 or HSP90 are shown as loading and transferring control. One representative Western Blot analysis out of two with similar results is reported. (D) qRT-PCR analysis of IL-1 $\beta$ , IL-8, IL-17, COX-2 and CCL2 expression in A375SM-SC1 control cells, bcl-2 overexpressing cells (Bcl-2) and bcl-2 overexpressing cells transiently transfected with IKBSR (Bcl-2 IKBSR). (E) qRT-PCR analysis of CD206, IL-10, CCL1, CCL22, IL-1 $\beta$ , IL-12 and COX-2 expression in human monocyte-derived macrophages after exposure to cultured medium from A375SM-SC1 control, bcl-2 overexpressing cells (Bcl-2) and bcl-2 overexpressing cells transiently transfected with IKBSR (Bcl-2 IKBSR). (A,D,E) Fold induction relative to control cells is reported and the average  $\pm$  SEM of three experiments is reported. p-values were calculated between (A) control and bcl-2 overexpressing cells or between (D,E) Bcl-2/6 cells and Bcl-2/6 overexpressing IKBSR cells, \*p<0.05.

**Online supplementary Figure S5. Macrophage recruitment and polarization in control and bcl-2 overexpressing tumors.** (A) *In vivo* tumor growth after subcutaneous injection of M14 control or bcl-2 overexpressing cells in nude mice. Representative images (B,C) and relative quantification (D,E) of peritumoral (PT) and intratumoral (IT) infiltration of (B) F4/80 and (C) CD206 and bcl-2 staining by IHC analysis of M14 control and bcl-2 overexpressing (M14 Bcl-2/6) tumors performed 15 or 30 days after cell injection. The results are reported as mean score. Score 0: no detectable infiltrate; score 1: low infiltrate; score 2: moderate infiltrate; score 3: high or very high infiltrate. Each dot (•) indicates an experimental point. 5 animals for each condition were evaluated. (A-E) The experiments have been repeated two times. p-values were calculated between control and bcl-2 overexpressing tumors, \*p<0.05; \*\*p<0.01.

**Online supplementary Figure S6. Immune infiltrate recruitment in control and bcl-2 overexpressing tumors.**

Representative Flow Cytometry graphs of (A) CD45<sup>+</sup> cells among live cells, (B) cd11b<sup>+</sup>F4/80<sup>+</sup> (TAM) among CD45<sup>+</sup> cells, (C) CD206<sup>+</sup> and (D) MHCII<sup>+</sup> cells among TAM, (E) CD3<sup>+</sup> among

CD45<sup>+</sup> cells, (F) CD4<sup>+</sup> and CD8<sup>+</sup> among CD3<sup>+</sup> cells, (G) IFN $\gamma$  production and (H) CD44<sup>+</sup>CD62L<sup>-</sup> among CD3<sup>+</sup> infiltrating cells in B16/F10 control or bcl-2 overexpressing tumors. (I) IHC analysis of F4/80 in B16/F10 control and bcl-2 overexpressing (Bcl-2) tumors treated with vehicle or with clodronate. Analysis was performed 18 days after cell injection.
