# Supplementary material for: Melanoma-specific bcl-2 promotes a protumoral M2-like phenotype by tumor-associated macrophages
Source: PubMed Central journal article supplement (PMC7254128; doi:10.1136/jitc-2019-000489), 2020-04-07
Supplement: jitc-2019-000489supp002.pdf [file jitc-2019-000489supp002.pdf]

| <b>GENE</b>                     | <b>FORWARD (5'-3')</b>   | <b>REVERSE (5'-3')</b>    |
|---------------------------------|--------------------------|---------------------------|
| <b>BCL-2</b>                    | CTGCACCTGACGCCCT5TCACC   | CACATGACCCCACCGAACTCAAAGA |
| <b>IL-10</b>                    | GCGCTGTCATCGATTCTTC      | TGGCTTTGTAGATGCCTTTCTC    |
| <b>IL-12</b>                    | GAGGCCTGTTACCATTGGA      | TCAAGGGAGGATTTTTGTGG      |
| <b>CD206</b>                    | GCTGTTCTCCTACTGGACACCA   | AATCTGAGATTCGGACACCCA     |
| <b>COX-2</b>                    | GTTCCACCCGCAGTACAGAA     | AGGGCTTCAGCATAAAGCGT      |
| <b>IL-1<math>\beta</math></b>   | TGGCCCTAAACAGATGAAGTGC   | CTGAAGCCCTTGCTGTAGTGGT    |
| <b>CCL1</b>                     | AAGAGCATGCAGGTACCCTTCT   | CTCATTGGAGCAGATGGAGCT     |
| <b>CCL22</b>                    | TGGCGCTTCAAGCAACTGA      | AAGTGTTTCACCACGCGCA       |
| <b>IL-1R1</b>                   | ACAAGGCCTTCTCCAAGAAGAATA | TGCATTTATCAGCCTCCAGAGA    |
| <b>IL-17</b>                    | TGGAATCTCCACCGCAATGA     | GCTGGATGGGGACAGAGTTC      |
| <b>IL-8</b>                     | CACCGGAAGGAACCATCTCA     | TGGCAAACTGCACCTTCACA      |
| <b>IL-17RA</b>                  | CGAATGGACACTGCAGACAGAC   | CAAACCTGACGCACAAACGTT     |
| <b>CXCR1</b>                    | TCAACCCCATCATCTACGCCT    | TGACGTGCCAAGAATCCTTG      |
| <b>IL-1R2</b>                   | TTCCGCTTGACGTGTTGGT      | TTGTAATGCCTCCCACGAAAC     |
| <b>IL-1Ra</b>                   | CCAGCTGGAGGCAGTTAACATC   | GCAGACTCAAACTGGTGGTGG     |
| <b>CCL2</b>                     | TCTCGCTCCAGCATGAAAGT     | GCATTGATTGCATCTGGCTGA     |
| <b>SDF-1</b>                    | ACACTCCAAACTGTGCCCTT     | CTGTAAGGGTTCCTCAGGCG      |
| <b>CSF-1</b>                    | ATGCGCTTCAGAGATAACACCC   | ATAGAAAGTTCGGACGCAGGC     |
| <b>VEGF</b>                     | TCTTCAAGCCATCCTTGTTG     | TCTGCATGGTGATGTTGGAC      |
| <b>CCR2</b>                     | GGAGAGCAGAGAGTGGAATGT    | GTGAAGGCGGAGATACAGGG      |
| <b>RORa</b>                     | TTCCCTACTGTTTCGTTACCA    | GTTTGGCAAACTCCACCACA      |
| <b>RORc</b>                     | GCCTCAGCTTTGACCTGTCTCA   | ATGTCTTGGTCCCCCAGAAGTC    |
| <b><math>\beta</math>-actin</b> | ATTGCCGACAGGATGCAGAA     | GCTGATCCACATCTGCTGGAA     |
