# Supplementary material for: Melanoma-specific bcl-2 promotes a protumoral M2-like phenotype by tumor-associated macrophages
Source: PubMed Central journal article supplement (PMC7254128; doi:10.1136/jitc-2019-000489), 2020-04-07
Supplement: jitc-2019-000489supp003.pdf [file jitc-2019-000489supp003.pdf]

| Supplementary material        |                        | <i>J Immunother Cancer</i> |
|-------------------------------|------------------------|----------------------------|
| <b>IL-1<math>\beta</math></b> | CTGTGTGTCTTCCACTTTGTCC | AATCGTTGTGCAGTTGATGTCC     |
| <b>IL-8</b>                   | GAAAACCTTTCGTCATACTCCG | GAAAGTTTGTGCCTTATGGAG      |
| <b>COX-2</b>                  | AGACATCTGGCGGAAACCTG   | AACCAAGCCCATGTGACGAA       |
| <b>CCL2</b>                   | CAGCAGATTAAACAGCC      | TTCTGGGTTAGTCTCAGC         |
