# Supplementary material for: Melanoma-specific bcl-2 promotes a protumoral M2-like phenotype by tumor-associated macrophages
Source: PubMed Central journal article supplement (PMC7254128; doi:10.1136/jitc-2019-000489), 2020-04-07

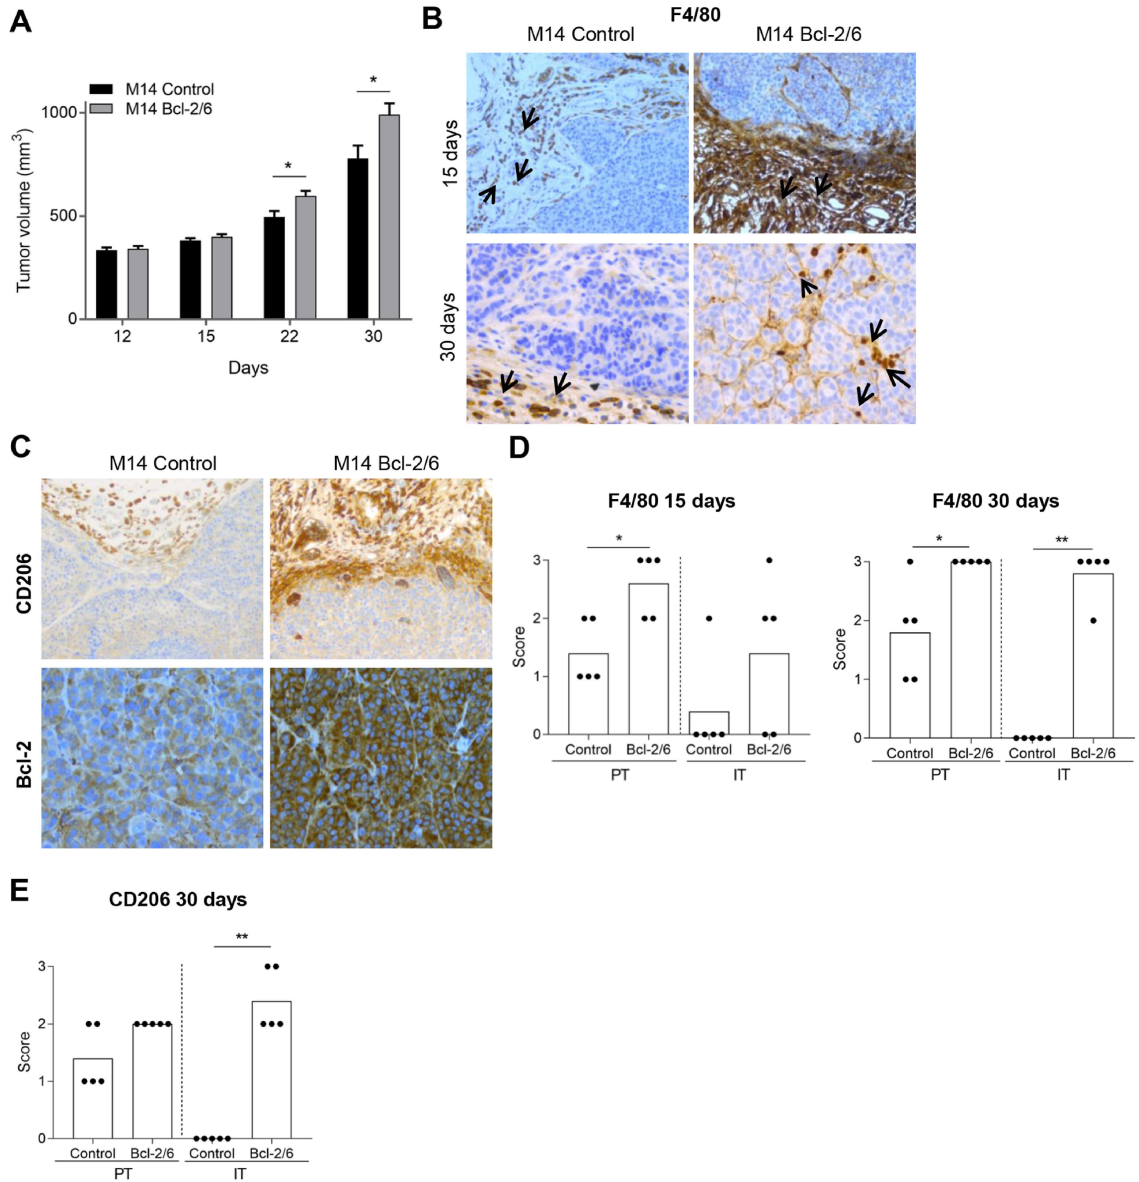

Supplement: jitc-2019-000489supp008.pdf [file jitc-2019-000489supp008.pdf]
